# Supplementary material for: Hybrid coffee cultivars may enhance agroecosystem resilience to climate change
Source: PubMed Central journal article supplement (PMC7991896; doi:10.1093/aobpla/plab010), 2021-02-25
Supplement: plab010_suppl_supplementary_material.pdf [file plab010_suppl_supplementary_material.pdf]

Supporting Information (SI) for:  
Hybrid coffee cultivars may enhance agroecosystem resilience to climate change

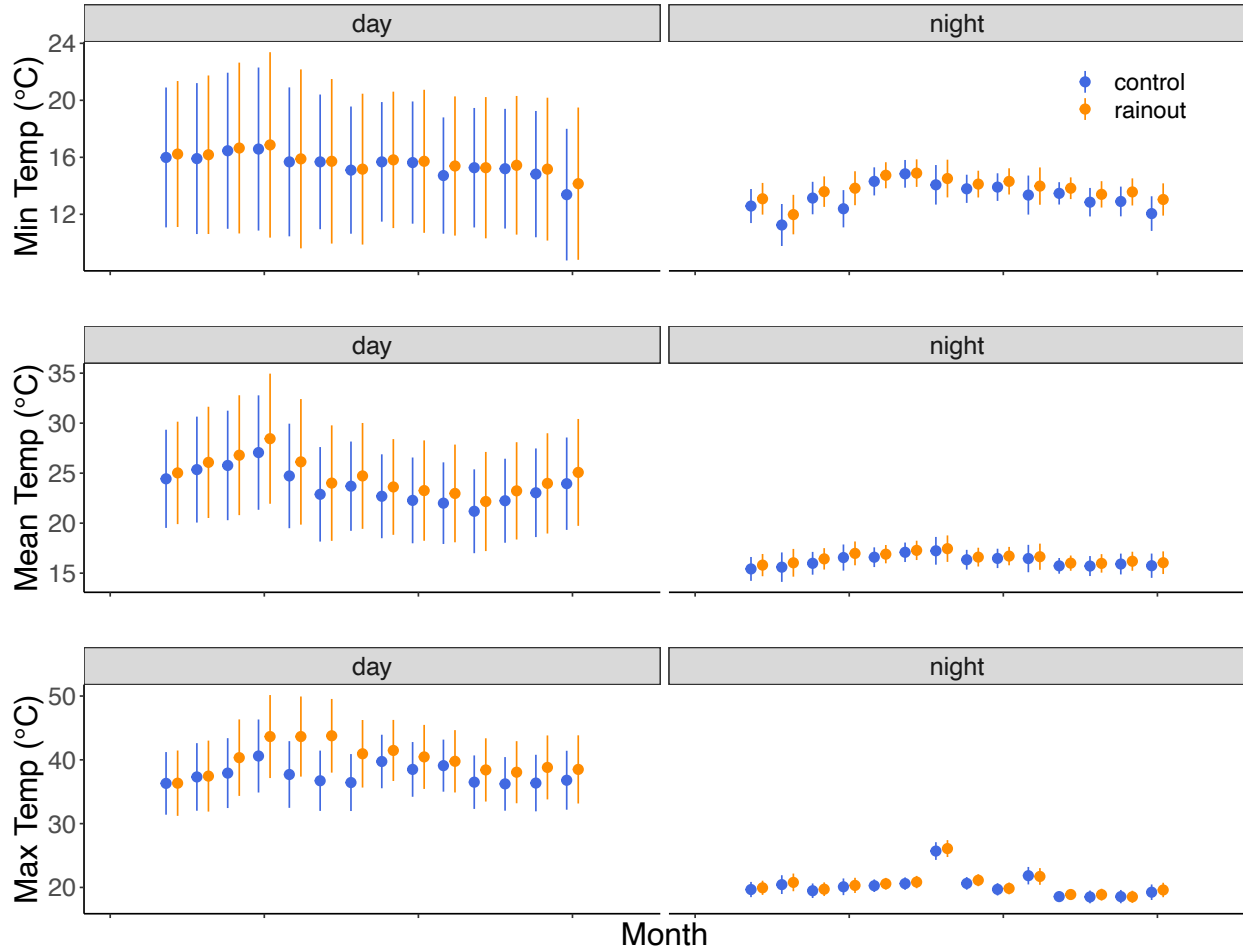

Supporting Information Figure S1 - Minimum, mean, and maximum temperatures (°C) for control (blue) and rainout (orange) plots, binned by month. The panels on the left show daytime temperatures (between 06:00 and 17:00) and those on the right show nighttime temperatures (between 17:01 and 05:59). Data points jittered for clarity.

| <b>Cultivar</b> | <b>Control</b> | <b>Rainout</b> |
|-----------------|----------------|----------------|
| <b>H10</b>      | 21.782910      | 28.108135      |
| <b>H1</b>       | 20.012182      | 25.823231      |
| <b>Cat44</b>    | -3.357078      | -4.331892      |
| <b>Cat</b>      | -18.778147     | -24.230862     |
| <b>VS</b>       | -19.659867     | -25.368612     |

Supporting Information Table S1 – Estimates of year one fruit weight (g) for each cultivar under control and rainout as offsets from the overall mean, as represented graphically in Figs. 4B and 4C.

| <b>Cultivar</b> | <b>Control</b> | <b>Rainout</b> |
|-----------------|----------------|----------------|
| <b>H10</b>      | 151.163378     | 40.896774      |
| <b>H1</b>       | 65.364242      | 17.684089      |
| <b>Cat44</b>    | -7.965862      | -2.155139      |
| <b>VS</b>       | -208.561757    | -56.425724     |

Supporting Information Table S2 – Estimates of year two fruit weight (g) for each cultivar under control and rainout as offsets from the overall mean, as represented graphically in Figs. 4E and 4F.

| <b>Cultivar</b> | <b>Control</b> | <b>Rainout</b> |
|-----------------|----------------|----------------|
| <b>H10</b>      | 25.29650       | 3.424621       |
| <b>H1</b>       | 32.14134       | 4.351270       |
| <b>Cat44</b>    | 48.28624       | 6.536954       |
| <b>Cat</b>      | -32.49331      | -4.398919      |
| <b>VS</b>       | -73.23077      | -9.913926      |

Supporting Information Table S3 – Estimates of biomass (g) for each cultivar under control and rainout as offsets from the overall mean, as represented graphically in Figs. 5B and 5C

|                 | <b>Sum Sq</b> | <b>Mean Sq</b> | <b>NumDF</b> | <b>DenDF</b> | <b>F value</b> | <b>Pr(&gt;F)</b> |
|-----------------|---------------|----------------|--------------|--------------|----------------|------------------|
| <b>trt</b>      | 208136.9      | 208136.89      | 1            | 14.1077      | 5.1816         | 0.0389           |
| <b>cult</b>     | 3044649.4     | 761162.36      | 4            | 723.0876     | 18.9494        | 0.0000           |
| <b>trt:cult</b> | 235540.3      | 58885.08       | 4            | 723.0005     | 1.4660         | 0.2108           |

Supporting Information Table S4 – ANOVA table for the model (using the packages lmer and lmerTest) showing the fruit weight results by treatment (“trt”) and cultivar (“cult”) for fruit weight over both years of the experiment. These model results indicate that the effects of treatment and cultivar were each significant ( $p < 0.05$ ) and there was not a significant interaction between treatments.

|                 | <b>Sum Sq</b> | <b>Mean Sq</b> | <b>NumDF</b> | <b>DenDF</b> | <b>F value</b> | <b>Pr(&gt;F)</b> |
|-----------------|---------------|----------------|--------------|--------------|----------------|------------------|
| <b>trt</b>      | 28593.131     | 28593.1309     | 1            | 14.0032      | 9.1857         | 0.0090           |
| <b>cult</b>     | 592163.574    | 148040.8934    | 4            | 216.0277     | 47.5591        | 0.0000           |
| <b>trt:cult</b> | 3916.759      | 979.1898       | 4            | 216.0277     | 0.3146         | 0.8681           |

Supporting Information Table S5 – ANOVA table for the model (using the packages lmer and lmerTest) showing the biomass results by treatment (“trt”) and cultivar (“cult”). These model results show that the effects of treatment and cultivar were each significant ( $p < 0.05$ ) and there was not a significant interaction.
